# Supplementary material for: Combining 'omics and microscopy to visualize interactions between the Asian citrus psyllid vector and the Huanglongbing pathogen Candidatus Liberibacter asiaticus in the insect gut
Source: PLoS One. 2017 Jun 20;12(6):e0179531. doi: 10.1371/journal.pone.0179531 (PMC5478155; doi:10.1371/journal.pone.0179531)
Supplement: S1 Table — A Fisher’s exact test was used to compare nLC-MS/MS spectral counts between treatment groups, and a P-value cutoff of 0.05 was employed to determine significance. A log2 fold change cut off of 0.5 was applied for differential expression. (XLSX) [file pone.0179531.s003.xlsx]

## Sheet: Table S1 Up-Regulated Fischer
				Spectral Counts
ACP Gut Proteome: Up-regulated proteins				CLas-	CLas-	CLas-	CLas-	CLas+	CLas+	CLas+
Identified Proteins	GI Number	Accession Number	Fisher's Exact Test (P-Value): (p <= 0.05)	Rep1	Rep2	Rep3	Rep4	Rep1	Rep2	Rep3	CLas- Avg	CLas+ Avg	Fold Change +/-	Log2FC
LOW QUALITY PROTEIN: trichohyalin-like [Diaphorina citri]	gi|662207555	XP_008477284.1	0.00046	0	0	0	1	7	0	2	0.25	3	12	3.58496
ataxin-2-like [Diaphorina citri]	gi|662219760	XP_008483980.1	0.0032	0	0	0	1	5	0	2	0.25	2.33333	9.33333	3.22239
peptidyl-prolyl cis-trans isomerase FKBP4-like [Diaphorina citri]	gi|662197075	XP_008471598.1	0.00072	0	0	0	2	9	0	1	0.5	3.33333	6.66667	2.73697
mannose-6-phosphate isomerase [Diaphorina citri]	gi|662199085	XP_008472692.1	0.021	0	0	0	1	4	0	1	0.25	1.66667	6.66667	2.73697
muscle-specific protein 20 [Diaphorina citri]	gi|662205302	XP_008476059.1	0.021	0	0	0	1	3	0	2	0.25	1.66667	6.66667	2.73697
small ubiquitin-related modifier 1-like [Diaphorina citri]	gi|662197589	XP_008471879.1	0.0018	0	0	0	2	7	0	2	0.5	3	6	2.58496
uncharacterized protein LOC103509476 [Diaphorina citri]	gi|662184532	XP_008472321.1	0.0018	1	1	0	0	4	2	3	0.5	3	6	2.58496
mitochondrial intermembrane space import and assembly protein 40-B-like [Diaphorina citri]	gi|662198120	XP_008472168.1	0.00021	0	1	1	2	8	4	2	1	4.66667	4.66667	2.22239
sorting nexin-2-like, partial [Diaphorina citri]	gi|662218844	XP_008483471.1	0.023	1	0	0	1	4	0	2	0.5	2	4	2
uncharacterized protein LOC103524312 [Diaphorina citri]	gi|662187805	XP_008487549.1	0.0024	0	0	0	4	5	3	3	1	3.66667	3.66667	1.87447
ADP-ribosylation factor GTPase-activating protein 2-like [Diaphorina citri]	gi|662188770	XP_008488073.1	0.0052	0	0	0	4	10	0	0	1	3.33333	3.33333	1.73697
myosin heavy chain 95F [Diaphorina citri]	gi|662200268	XP_008473333.1	0.023	1	2	0	0	4	1	2	0.75	2.33333	3.11111	1.63743
calumenin-like [Diaphorina citri]	gi|662212808	XP_008480158.1	0.011	0	1	3	0	3	3	3	1	3	3	1.58496
small ubiquitin-related modifier 3 [Diaphorina citri]	gi|662207255	XP_008477124.1	0.011	0	0	0	4	6	0	3	1	3	3	1.58496
dentin sialophosphoprotein [Diaphorina citri]	gi|662203529	XP_008475106.1	0.00015	2	3	2	4	15	3	4	2.75	7.33333	2.66667	1.41504
LOW QUALITY PROTEIN: uncharacterized protein LOC103517088 [Diaphorina citri]	gi|662213105	XP_008480321.1	0.023	0	3	0	1	5	1	2	1	2.66667	2.66667	1.41504
heterogeneous nuclear ribonucleoprotein H2-like, partial [Diaphorina citri]	gi|662224872	XP_008486801.1	0.049	1	0	1	1	4	1	1	0.75	2	2.66667	1.41504
basic salivary proline-rich protein 2-like, partial [Diaphorina citri]	gi|662223032	XP_008485792.1	0.005	1	1	2	3	7	1	5	1.75	4.33333	2.47619	1.30812
BSD domain-containing protein 1-A-like, partial [Diaphorina citri]	gi|662223713	XP_008486160.1	0.045	0	1	1	2	6	1	0	1	2.33333	2.33333	1.22239
diamine acetyltransferase 2-like [Diaphorina citri]	gi|662193537	XP_008469679.1	0.045	0	0	0	4	4	1	2	1	2.33333	2.33333	1.22239
pumilio homolog 1-like [Diaphorina citri]	gi|662200604	XP_008473520.1	0.045	0	0	3	1	5	0	2	1	2.33333	2.33333	1.22239
ras GTPase-activating protein-binding protein 1 isoform X1 [Diaphorina citri]	gi|662201420 (+1)	XP_008473962.1	0.0011	1	3	1	6	12	0	7	2.75	6.33333	2.30303	1.20353
muscle-specific protein 20 isoform X1 [Diaphorina citri]	gi|662186363 (+2)	XP_008481814.1	0.00027	1	4	0	9	13	6	5	3.5	8	2.28571	1.19265
LOW QUALITY PROTEIN: ubiquitin carboxyl-terminal hydrolase 5-like [Diaphorina citri]	gi|662192436	XP_008469074.1	0.0097	0	2	0	5	10	0	2	1.75	4	2.28571	1.19265
heterogeneous nuclear ribonucleoprotein A1, A2/B1 homolog [Diaphorina citri]	gi|662217828	XP_008482914.1	0.0045	2	1	2	4	11	0	4	2.25	5	2.22222	1.152
beta-ureidopropionase-like [Diaphorina citri]	gi|662190939	XP_008468259.1	0.00012	3	7	1	7	9	10	10	4.5	9.66667	2.14815	1.10309
protein CDV3 homolog isoform X1 [Diaphorina citri]	gi|662186146 (+1)	XP_008480692.1	0.00012	1	5	1	11	18	2	9	4.5	9.66667	2.14815	1.10309
mucin-22-like [Diaphorina citri]	gi|662188059	XP_008487686.1	0.00093	2	3	3	6	9	5	8	3.5	7.33333	2.09524	1.06711
LOW QUALITY PROTEIN: prefoldin subunit 5 [Diaphorina citri]	gi|662203131	XP_008474886.1	0.018	2	0	0	5	9	0	2	1.75	3.66667	2.09524	1.06711
uncharacterized protein LOC103524590 isoform X1 [Diaphorina citri]	gi|662188339 (+2)	XP_008487838.1	0.018	0	0	2	5	6	2	3	1.75	3.66667	2.09524	1.06711
THO complex subunit 4 [Diaphorina citri]	gi|662211375	XP_008479372.1	0.0039	2	2	3	4	10	0	7	2.75	5.66667	2.06061	1.04307
gamma-glutamyl hydrolase A-like [Diaphorina citri]	gi|662200678	XP_008473562.1	< 0.00010	13	16	13	26	39	24	39	17	34	2	1
uncharacterized protein LOC103506496 [Diaphorina citri]	gi|662192496	XP_008469106.1	0.00017	2	9	4	6	21	2	8	5.25	10.3333	1.96825	0.976916
leucine-rich repeat flightless-interacting protein 2 [Diaphorina citri]	gi|662211037	XP_008479189.1	0.034	1	0	1	5	7	1	2	1.75	3.33333	1.90476	0.929611
26S proteasome non-ATPase regulatory subunit 7 [Diaphorina citri]	gi|662189383	XP_008467415.1	0.0012	3	4	2	9	13	4	8	4.5	8.33333	1.85185	0.888969
sorting nexin-12 [Diaphorina citri]	gi|662183206 (+1)	XP_008477306.1	0.012	1	3	0	7	10	1	4	2.75	5	1.81818	0.862496
uncharacterized protein LOC103516776, partial [Diaphorina citri]	gi|662212495	XP_008479986.1	0.012	3	3	0	5	9	1	5	2.75	5	1.81818	0.862496
vigilin-like [Diaphorina citri]	gi|662195929	XP_008470971.1	0.012	2	3	0	6	10	1	4	2.75	5	1.81818	0.862496
KH domain-containing, RNA-binding, signal transduction-associated protein 2-like isoform X1 [Diaphorina citri]	gi|662200724 (+2)	XP_008473587.1	0.0053	4	4	2	4	10	5	4	3.5	6.33333	1.80952	0.85561
RNA-binding protein FUS-like [Diaphorina citri]	gi|662202376	XP_008474482.1	0.027	1	5	0	3	6	2	4	2.25	4	1.77778	0.830075
filamin-A [Diaphorina citri]	gi|662214928	XP_008481319.1	0.024	2	2	1	5	5	3	5	2.5	4.33333	1.73333	0.793549
transport and Golgi organization 2 homolog [Diaphorina citri]	gi|662185463	XP_008477227.1	0.0015	2	2	0	17	18	1	8	5.25	9	1.71429	0.777608
uncharacterized protein LOC103507921 [Diaphorina citri]	gi|662195347	XP_008470662.1	0.0023	3	4	6	9	14	6	7	5.5	9	1.63636	0.710493
MAP7 domain-containing protein 1 [Diaphorina citri]	gi|662207290	XP_008477143.1	< 0.00010	9	13	10	22	31	12	22	13.5	21.6667	1.60494	0.682518
uncharacterized protein LOC103506538 [Diaphorina citri]	gi|662192580	XP_008469154.1	< 0.00010	7	17	8	31	32	19	24	15.75	25	1.5873	0.666576
eukaryotic translation initiation factor 4B, partial [Diaphorina citri]	gi|662196964	XP_008471536.1	0.011	5	0	0	12	12	3	5	4.25	6.66667	1.56863	0.649503
heterogeneous nuclear ribonucleoprotein K-like [Diaphorina citri]	gi|662199674	XP_008473011.1	0.028	1	5	1	6	9	1	5	3.25	5	1.53846	0.621488
PBAN-type neuropeptides-like [Diaphorina citri]	gi|662211235	XP_008479295.1	0.028	2	2	7	2	5	5	5	3.25	5	1.53846	0.621488
leucine-rich repeat-containing protein 15-like, partial [Diaphorina citri]	gi|662188061	XP_008487687.1	0.00037	4	11	10	14	19	13	12	9.75	14.6667	1.50427	0.589067
diamine acetyltransferase 2-like [Diaphorina citri]	gi|662210464	XP_008478874.1	0.02	2	1	0	13	11	2	5	4	6	1.5	0.584963
la protein homolog isoform X1 [Diaphorina citri]	gi|662203083 (+1)	XP_008474861.1	0.02	0	3	0	13	13	0	5	4	6	1.5	0.584963
serine/threonine-protein kinase par-1-like [Diaphorina citri]	gi|662183391	XP_008485788.1	< 0.00010	8	23	8	32	49	3	27	17.75	26.3333	1.48357	0.569071
alcohol dehydrogenase [NADP(+)]-like [Diaphorina citri]	gi|662188922	XP_008488157.1	0.0086	0	6	0	17	19	2	4	5.75	8.33333	1.44928	0.535332
putative uncharacterized protein DDB_G0282133 [Diaphorina citri]	gi|662197467	XP_008471814.1	0.046	2	2	1	8	11	0	3	3.25	4.66667	1.4359	0.521953
phosphoglycerate mutase 1-like [Diaphorina citri]	gi|662188457	XP_008487904.1	0.0008	5	5	2	28	21	4	18	10	14.3333	1.43333	0.519374
molecular chaperone DnaK [Candidatus Liberibacter asiaticus str. psy62]	gi|254547845 (+5)	ACT57110.2	< 0.00010	10	14	8	24	20	32	8	14	20	1.42857	0.514573
peptidyl-prolyl cis-trans isomerase NIMA-interacting 1-like [Diaphorina citri]	gi|662189455	XP_008467456.1	0.0031	5	8	2	17	20	4	10	8	11.3333	1.41667	0.5025
UV excision repair protein RAD23 homolog B-like [Diaphorina citri]	gi|662207760	XP_008477398.1	0.032	2	3	1	10	8	4	5	4	5.66667	1.41667	0.5025
integrin beta-PS [Diaphorina citri]	gi|662209660	XP_008478443.1	0.025	2	6	3	7	8	5	6	4.5	6.33333	1.40741	0.49304
glutaredoxin-C3-like [Diaphorina citri]	gi|662189693	XP_008467584.1	0.011	3	6	3	13	12	7	7	6.25	8.66667	1.38667	0.471621
spermine synthase-like [Diaphorina citri]	gi|662219427 (+1)	XP_008483797.1	0.0094	2	5	0	19	13	3	11	6.5	9	1.38462	0.469485
uncharacterized protein LOC103514871, partial [Diaphorina citri]	gi|662208869	XP_008478010.1	0.0014	6	10	9	21	17	12	17	11.5	15.3333	1.33333	0.415037
NSFL1 cofactor p47-like [Diaphorina citri]	gi|662217037	XP_008482482.1	0.016	2	2	2	19	14	2	9	6.25	8.33333	1.33333	0.415037
uncharacterized protein LOC103512899 [Diaphorina citri]	gi|662205017	XP_008475907.1	0.03	2	5	2	11	11	2	7	5	6.66667	1.33333	0.415037
maltase 1-like [Diaphorina citri]	gi|662204587	XP_008475674.1	0.01	6	12	8	3	12	8	9	7.25	9.66667	1.33333	0.415037
uncharacterized protein LOC103519308 [Diaphorina citri]	gi|662217272	XP_008482610.1	0.01	3	5	3	18	11	7	11	7.25	9.66667	1.33333	0.415037
anamorsin homolog [Diaphorina citri]	gi|662199242	XP_008472778.1	0.034	2	1	0	16	12	0	7	4.75	6.33333	1.33333	0.415037
NSFL1 cofactor p47-like [Diaphorina citri]	gi|662189805	XP_008467645.1	0.003	5	4	2	32	25	5	12	10.75	14	1.30233	0.38109
far upstream element-binding protein 1-like [Diaphorina citri]	gi|662195275	XP_008470619.1	0.00073	11	17	6	25	33	6	18	14.75	19	1.28814	0.365284
calexcitin-2-like [Diaphorina citri]	gi|662220668	XP_008484482.1	0.015	3	6	2	18	13	6	9	7.25	9.33333	1.28736	0.364411
uncharacterized protein LOC103514874, partial [Diaphorina citri]	gi|662208875	XP_008478013.1	0.028	4	7	4	9	10	5	8	6	7.66667	1.27778	0.353637
ubiquitin-conjugating enzyme E2 L3 [Diaphorina citri]	gi|662190937	XP_008468258.1	0.0062	6	5	2	27	22	5	11	10	12.6667	1.26667	0.341037
gelsolin-related protein of 125 kDa-like [Diaphorina citri]	gi|662190918	XP_008468248.1	0.045	2	3	3	12	13	0	6	5	6.33333	1.26667	0.341037
myosin regulatory light chain sqh [Diaphorina citri]	gi|662209192	XP_008478185.1	0.0078	4	7	6	21	14	10	12	9.5	12	1.26316	0.337035
probable transaldolase [Diaphorina citri]	gi|662196141	XP_008471087.1	0.0021	4	14	2	33	25	6	19	13.25	16.6667	1.25786	0.330973
uncharacterized protein LOC103521582 [Diaphorina citri]	gi|662221442	XP_008484914.1	0.0045	8	17	4	17	14	17	12	11.5	14.3333	1.24638	0.31774
SH3 domain-binding glutamic acid-rich protein homolog [Diaphorina citri]	gi|662192935	XP_008469348.1	0.0057	5	11	4	24	19	7	15	11	13.6667	1.24242	0.313158
myoglobin-like, partial [Diaphorina citri]	gi|662223016	XP_008485782.1	0.0037	8	8	2	33	24	6	17	12.75	15.6667	1.22876	0.297201
platelet-activating factor acetylhydrolase IB subunit beta isoform X1 [Diaphorina citri]	gi|662195894 (+2)	XP_008470954.1	0.00013	14	17	10	57	48	10	31	24.5	29.6667	1.21088	0.276061
proteoglycan 4-like [Diaphorina citri]	gi|662189087	XP_008488247.1	0.00027	12	23	12	47	47	6	31	23.5	28	1.19149	0.252766
charged multivesicular body protein 3 [Diaphorina citri]	gi|662210407	XP_008478843.1	0.0028	11	12	6	34	30	8	18	15.75	18.6667	1.18519	0.245112
synaptic vesicle membrane protein VAT-1 homolog-like [Diaphorina citri]	gi|662219530	XP_008483854.1	0.046	3	6	3	14	11	5	7	6.5	7.66667	1.17949	0.23816
26S protease regulatory subunit 7 [Diaphorina citri]	gi|662198887	XP_008472582.1	0.033	5	11	5	11	10	8	10	8	9.33333	1.16667	0.222392
ankyrin-3-like [Diaphorina citri]	gi|662187150	XP_008485685.1	0.041	3	12	3	12	13	4	9	7.5	8.66667	1.15556	0.208587
RNA-binding protein squid-like [Diaphorina citri]	gi|662183919	XP_008469085.1	0.026	5	9	4	19	19	1	12	9.25	10.6667	1.15315	0.205584
platelet-activating factor acetylhydrolase IB subunit gamma-like, partial [Diaphorina citri]	gi|662224830	XP_008486778.1	0.0084	5	12	9	30	23	5	20	14	16	1.14286	0.192645
T-complex protein 1 subunit beta-like [Diaphorina citri]	gi|662192697	XP_008469218.1	0.032	5	11	3	16	16	3	11	8.75	10	1.14286	0.192645
suppressor protein SRP40-like [Diaphorina citri]	gi|662187115	XP_008485527.1	0.045	6	9	6	14	15	4	10	8.75	9.66667	1.10476	0.143735
flocculation protein FLO11 [Diaphorina citri]	gi|662203575	XP_008475131.1	0.00021	19	41	28	71	65	13	50	39.75	42.6667	1.07338	0.102155
eukaryotic translation initiation factor 4 gamma-like [Diaphorina citri]	gi|662185547	XP_008477662.1	0.027	5	12	3	31	21	4	16	12.75	13.6667	1.0719	0.100164
stress-induced-phosphoprotein 1 [Diaphorina citri]	gi|662190521	XP_008468033.1	0.033	3	13	2	31	19	7	13	12.25	13	1.06122	0.0857299
plasminogen activator inhibitor 1 RNA-binding protein-like [Diaphorina citri]	gi|662184906	XP_008474367.1	0.037	8	11	9	20	21	6	11	12	12.6667	1.05556	0.0780025
nascent polypeptide-associated complex subunit alpha [Diaphorina citri]	gi|662214040	XP_008480836.1	0.026	10	13	7	27	21	8	16	14.25	15	1.05263	0.0740006
uncharacterized protein LOC103507470 [Diaphorina citri]	gi|662194427	XP_008470163.1	0.025	10	21	7	22	21	9	17	15	15.6667	1.04444	0.0627358
uncharacterized protein LOC103508542 [Diaphorina citri]	gi|662196567	XP_008471321.1	0.028	10	19	3	27	25	6	15	14.75	15.3333	1.03955	0.0559564
serine protease inhibitor 3/4-like isoform X5 [Diaphorina citri]	gi|662183302	XP_008481779.1	0.014	11	17	3	46	27	16	17	19.25	20	1.03896	0.0551416
serpin-ZXA-like isoform X1 [Diaphorina citri]	gi|662183294	XP_008481519.1	0.014	11	17	3	46	27	16	17	19.25	20	1.03896	0.0551416
sulfatase-modifying factor 1 [Diaphorina citri]	gi|662211801	XP_008479606.1	0.017	14	20	12	26	23	12	21	18	18.6667	1.03704	0.0524674
nucleoplasmin-like protein ANO39 [Diaphorina citri]	gi|662205752	XP_008476302.1	0.039	8	10	4	31	22	5	14	13.25	13.6667	1.03145	0.044669
uncharacterized protein LOC103524429 [Diaphorina citri]	gi|662188023	XP_008487666.1	0.0098	13	20	3	58	39	8	25	23.5	24	1.02128	0.0303736
glutathione S-transferase-like, partial [Diaphorina citri]	gi|662203702	XP_008475195.1	0.019	13	18	11	37	26	11	23	19.75	20	1.01266	0.0181473
beta-lactamase-like protein 2 isoform X1 [Diaphorina citri]	gi|662185469 (+2)	XP_008477272.1	0.009	16	22	15	50	38	13	27	25.75	26	1.00971	0.0139392
target of Myb protein 1 isoform X5 [Diaphorina citri]	gi|662205097 (+1)	XP_008475949.1	0.002	25	35	19	75	59	18	39	38.5	38.6667	1.00433	0.00623195
thioredoxin domain-containing protein 5 [Diaphorina citri]	gi|662209343	XP_008478267.1	0.018	11	22	16	36	26	16	22	21.25	21.3333	1.00392	0.00564656
Below the 0.5 log2 fold change cutoff
